# Supplementary material for: Temperature-induced single-crystal-to-single-crystal transformation of a binuclear Mn(ii) complex into a 1D chain polymer
Source: Royal Society of Chemistry journal article supplement (doi:10.1039/c6ra14364d), 2016-01-01
Supplement: c6ra14364d1.pdf [file c6ra14364d1.pdf]

## *Electronic Supplementary Information for*

# Temperature-induced single-crystal-to-single-crystal transformation of a binuclear Mn(II) complex into a 1D chain polymer

Peng Jiang, Fen Peng and Yanmei Chen\*

*Hubei Key Laboratory for Processing and Application of Catalytic Materials, College of Chemical Engineering, Huanggang Normal University, Huanggang, 438000, China.*

|                                                                                                                                                                                                                               |   |
|-------------------------------------------------------------------------------------------------------------------------------------------------------------------------------------------------------------------------------|---|
| <b>Table S1</b> Selected Bond Lengths (Å) and Bond Angles (°) for <b>1</b> and <b>2</b> .....                                                                                                                                 | 2 |
| <b>Table S2</b> Hydrogen Bond Lengths (Å) and Bond Angles (°) for <b>1</b> .....                                                                                                                                              | 3 |
| <b>Table S3</b> Hydrogen Bond Lengths (Å) and Bond Angles (°) for <b>2</b> .....                                                                                                                                              | 3 |
| <b>Fig S1</b> The powder XRD spectra of <b>1</b> . ....                                                                                                                                                                       | 4 |
| <b>Fig S2</b> The powder XRD spectra of <b>2</b> . ....                                                                                                                                                                       | 4 |
| <b>Fig S3</b> The TGA-DSC curve of complex <b>1</b> . ....                                                                                                                                                                    | 5 |
| <b>Fig S4</b> The TGA-DSC curve of complex <b>2</b> . ....                                                                                                                                                                    | 5 |
| <b>Fig S5</b> The IR spectrum of complex <b>1</b> .....                                                                                                                                                                       | 6 |
| <b>Fig S6</b> The IR spectrum of complex <b>2</b> .....                                                                                                                                                                       | 6 |
| <b>Fig S7</b> ORTEP figure of asymmetric units in <b>1</b> (with 50% probability).....                                                                                                                                        | 6 |
| <b>Fig S8</b> ORTEP figure of asymmetric units in <b>2</b> (with 50% probability).....                                                                                                                                        | 7 |
| <b>Fig S9</b> 24-hours moisture absorption experiments of complexes <b>1</b> and <b>2</b> .....                                                                                                                               | 7 |
| <b>Fig S10</b> Temperature dependence of magnetic susceptibilities in the form of $\chi_M T$ vs $T$ for <b>1</b> at 1 kOe (heating-cooling cycle in 1.8-400 K), and $\chi_M T$ vs $T$ for <b>2</b> (2-300 K).....             | 8 |
| <b>Fig S11</b> Temperature dependence of magnetic susceptibilities in the form of $\chi_M^{-1}$ v $T$ for <b>1</b> at 1 kOe (heating-cooling cycle from 1.8-400 K), and $\chi_M^{-1}$ vs $T$ for <b>2</b> (2-300 K).<br>..... | 8 |
| <b>Heating-cooling cycle magnetic properties discussion</b> .....                                                                                                                                                             | 8 |

**Table S1** Selected Bond Lengths (Å) and Bond Angles (°) for **1** and **2**.

| Complex 1        |            |                   |            |
|------------------|------------|-------------------|------------|
| Mn(1)-O(1)       | 2.1360(12) | Mn(1)-O(2)        | 2.1902(13) |
| Mn(1)-O(3)       | 2.1720(12) | Mn(1)-O(4)        | 2.2048(11) |
| Mn(1)-O(4)A      | 2.2101(12) | Mn(1)-O(5)        | 2.2220(12) |
| O(1)-Mn(1)-O(3)  | 168.07(5)  | O(1)-Mn(1)-O(2)   | 74.93(4)   |
| O(3)-Mn(1)-O(2)  | 93.26(5)   | O(1)-Mn(1)-O(4)   | 108.11(5)  |
| O(3)-Mn(1)-O(4)  | 74.50(4)   | O(2)-Mn(1)-O(4)   | 97.13(5)   |
| O(1)-Mn(1)-O(4)A | 93.77(4)   | O(3)-Mn(1)-O(4)A  | 98.13(4)   |
| O(2)-Mn(1)-O(4)A | 168.06(4)  | O(4)-Mn(1)-O(4)A  | 82.55(5)   |
| O(1)-Mn(1)-O(5)  | 89.47(5)   | O(3)-Mn(1)-O(5)   | 89.57(4)   |
| O(2)-Mn(1)-O(5)  | 93.26(5)   | O(4)-Mn(1)-O(5)   | 161.39(4)  |
| O(4)A-Mn(1)-O(5) | 90.43(5)   | C(7)-O(1)-Mn(1)   | 115.71(10) |
| C(14)-O(3)-Mn(1) | 114.78(10) | N(1)-O(4)-Mn(1)   | 109.04(8)  |
| N(1)-O(4)-Mn(1)A | 107.65(8)  | Mn(1)-O(4)-Mn(1)A | 97.45(5)   |
| Mn(1)-O(5)-H(5A) | 110.7      | Mn(1)-O(5)-H(5B)  | 119.1      |
| N(3)-O(2)-Mn(1)  | 109.05(9)  |                   |            |

Symmetry transformations used to generate equivalent atoms: A: -x+1,-y+1,-z

  

| Complex 2         |            |                   |            |
|-------------------|------------|-------------------|------------|
| Mn(1)-O(1)A       | 2.1251(13) | Mn(1)-O(1)        | 2.1251(13) |
| Mn(1)-O(2)B       | 2.2135(17) | Mn(1)-O(2)C       | 2.2135(17) |
| Mn(1)-O(2)A       | 2.2518(17) | Mn(1)-O(2)        | 2.2518(17) |
| O(2)-Mn(1)D       | 2.2135(17) | O(1)A-Mn(1)-O(1)  | 177.20(14) |
| O(1)A-Mn(1)-O(2)B | 96.21(8)   | O(1)-Mn(1)-O(2)B  | 85.90(6)   |
| O(1)A-Mn(1)-O(2)C | 85.90(6)   | O(1)-Mn(1)-O(2)C  | 96.21(8)   |
| O(2)B-Mn(1)-O(2)C | 82.78(8)   | O(1)A-Mn(1)-O(2)A | 73.63(6)   |
| O(1)-Mn(1)-O(2)A  | 104.17(8)  | O(2)B-Mn(1)-O(2)A | 101.81(5)  |
| O(2)C-Mn(1)-O(2)A | 159.34(6)  | O(1)A-Mn(1)-O(2)  | 104.17(8)  |
| O(1)-Mn(1)-O(2)   | 73.62(6)   | O(2)B-Mn(1)-O(2)  | 159.34(6)  |
| O(2)C-Mn(1)-O(2)  | 101.81(5)  | O(2)A-Mn(1)-O(2)  | 81.07(8)   |
| N(1)-O(2)-Mn(1)D  | 114.22(12) | N(1)-O(2)-Mn(1)   | 108.13(12) |
| Mn(1)D-O(2)-Mn(1) | 98.08(5)   | C(7)-O(1)-Mn(1)   | 117.62(13) |

Symmetry transformations used to generate equivalent atoms:

A: -x,-y+1,z; B: -x+0,y+0,z-1/2; C: x+0,-y+1,z-1/2; D: x+0,-y+1,z+1/2.

**Table S2** Hydrogen Bond Lengths (Å) and Bond Angles (°) for **1**.

| D-H...A            | d(D-H) | d(H...A) | d(D...A)   | <(DHA) |
|--------------------|--------|----------|------------|--------|
| N(1)-H(1)···N(2)B  | 0.85   | 2.22     | 3.039(2)   | 161.0  |
| N(2)-H(2A)···O(5)C | 0.81   | 2.39     | 3.132(2)   | 152.8  |
| N(2)-H(2B)···O(6)D | 0.83   | 2.18     | 3.006(3)   | 171.0  |
| O(5)-H(5A)···O(3)E | 0.85   | 2.00     | 2.8049(18) | 158.2  |
| O(5)-H(5B)···O(2)E | 0.85   | 1.86     | 2.6755(17) | 159.9  |
| O(6)-H(6B)···O(2)  | 0.85   | 2.09     | 2.769(2)   | 136.5  |
| N(4)-H(4A)···O(4)F | 0.81   | 2.25     | 3.057(2)   | 177.3  |
| N(4)-H(4B)···O(6)G | 0.81   | 2.35     | 3.055(3)   | 145.4  |

Symmetry transformations used to generate equivalent atoms:

A:  $-x+1,-y+1,-z$ ; B:  $-x+3/2,y-1/2,-z-1/2$ ; C:  $x+1/2,-y+3/2,z-1/2$ ;

D:  $x-1/2,-y+3/2,z-1/2$ ; E:  $-x+1,-y+2,-z$ ; F:  $-x+3/2,y+1/2,-z+1/2$

G:  $x-1/2,-y+3/2,z+1/2$ .

**Table S3** Hydrogen Bond Lengths (Å) and Bond Angles (°) for **2**

| D-H...A            | d(D-H) | d(H...A) | d(D...A) | <(DHA) |
|--------------------|--------|----------|----------|--------|
| N(2)-H(2C)···O(2)E | 0.95   | 2.01     | 2.964(2) | 176.0  |
| N(2)-H(2C)···N(1)E | 0.95   | 2.44     | 3.267(2) | 144.7  |
| C(2)-H(2A)···O(1)  | 0.93   | 2.47     | 2.787(2) | 99.8   |

Symmetry transformations used to generate equivalent atoms:

A:  $-x,-y+1,z$ ; B:  $-x+0,y+0,z-1/2$ ; C:  $x+0,-y+1,z-1/2$ ;

D:  $x+0,-y+1,z+1/2$ ; E:  $-x+1/2,y-1/2,z$ .

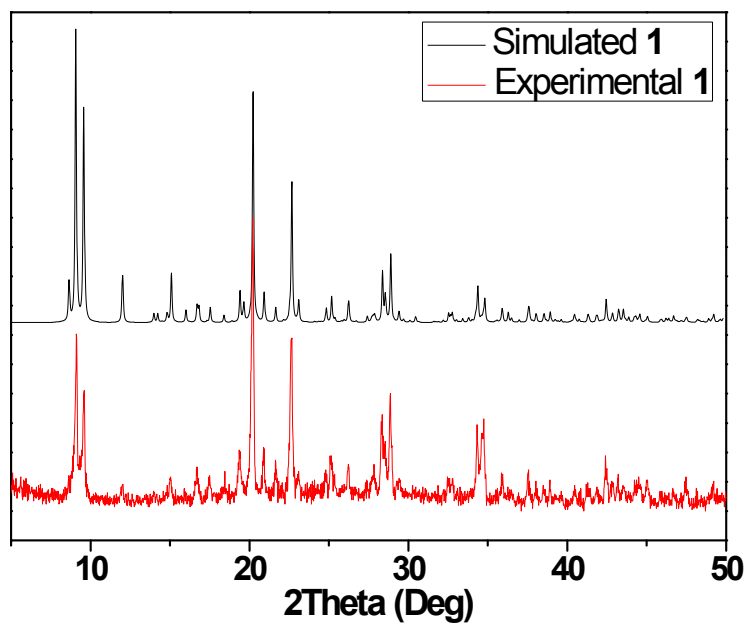

**Fig S1** The powder XRD spectra of **1**.

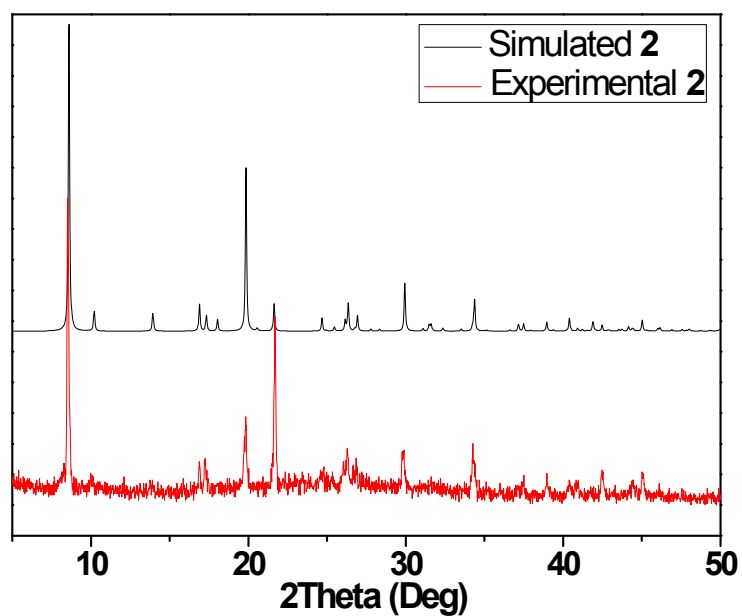

**Fig S2** The powder XRD spectra of **2**.

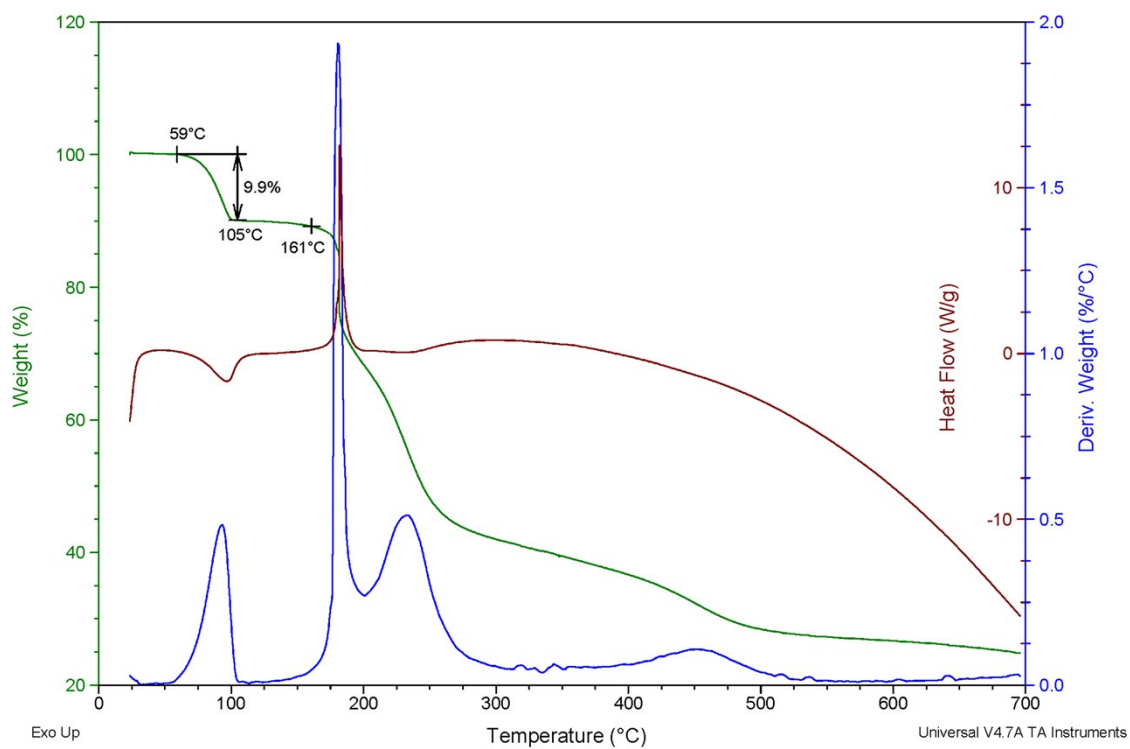

**Fig S3** The TGA-DSC curve of complex 1.

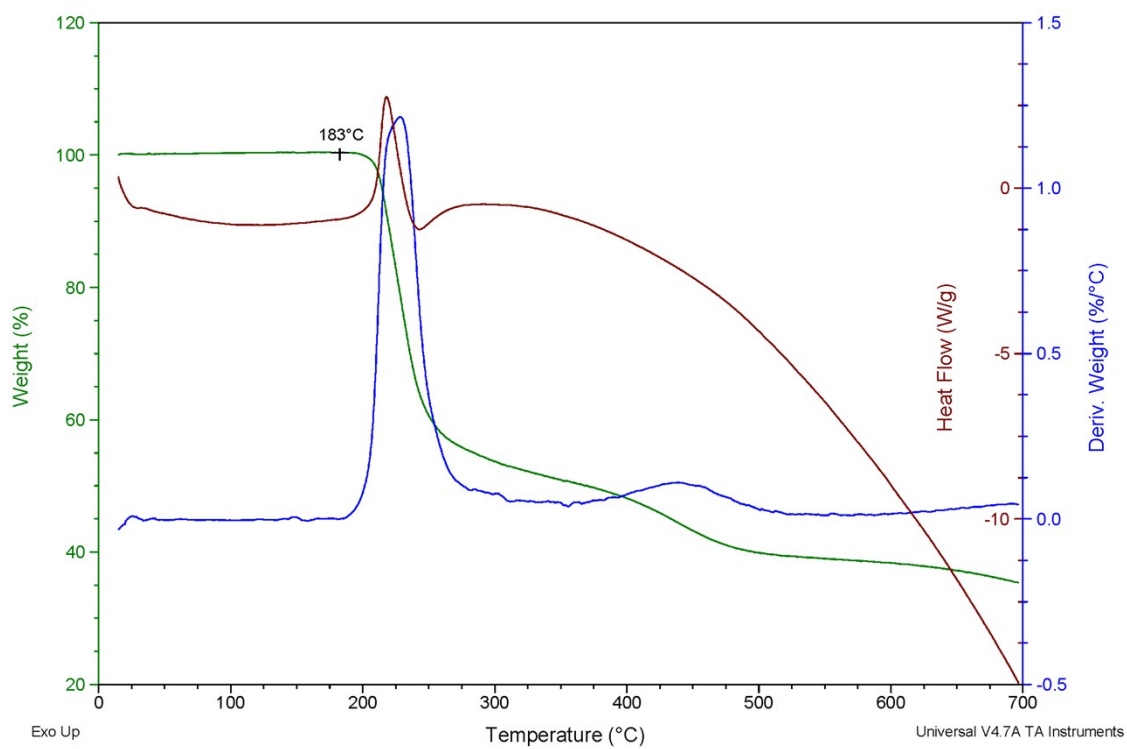

**Fig S4** The TGA-DSC curve of complex 2.

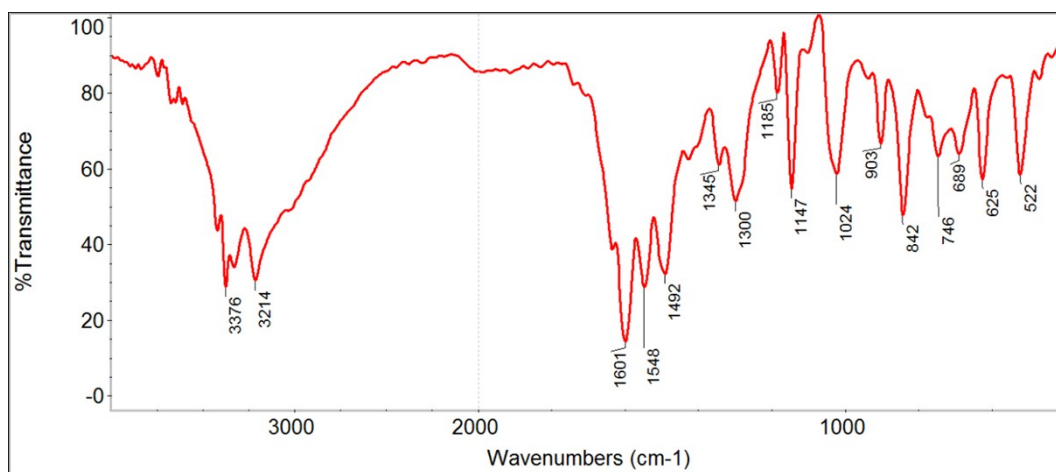

**Fig S5** The IR spectrum of complex **1**

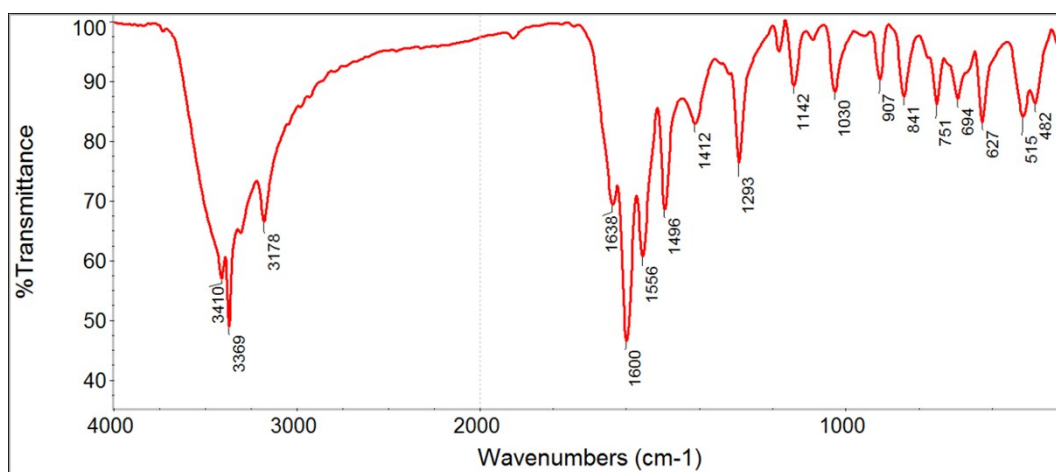

**Fig S6** The IR spectrum of complex **2**

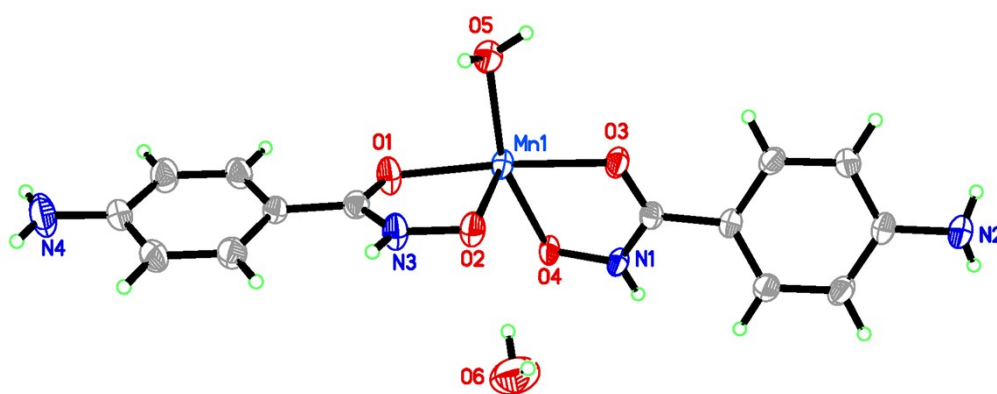

**Fig S7** ORTEP figure of asymmetric units in **1** (with 50% probability).

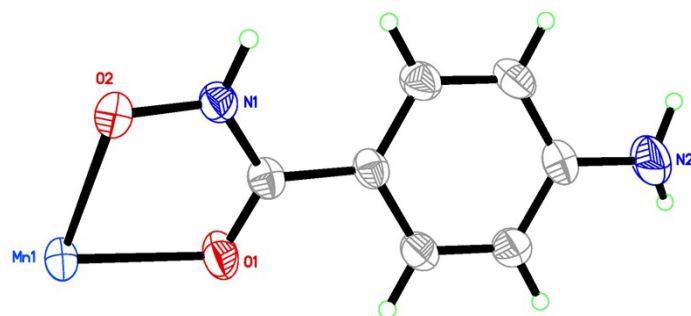

**Fig S8** ORTEP figure of asymmetric units in **2** (with 50% probability).

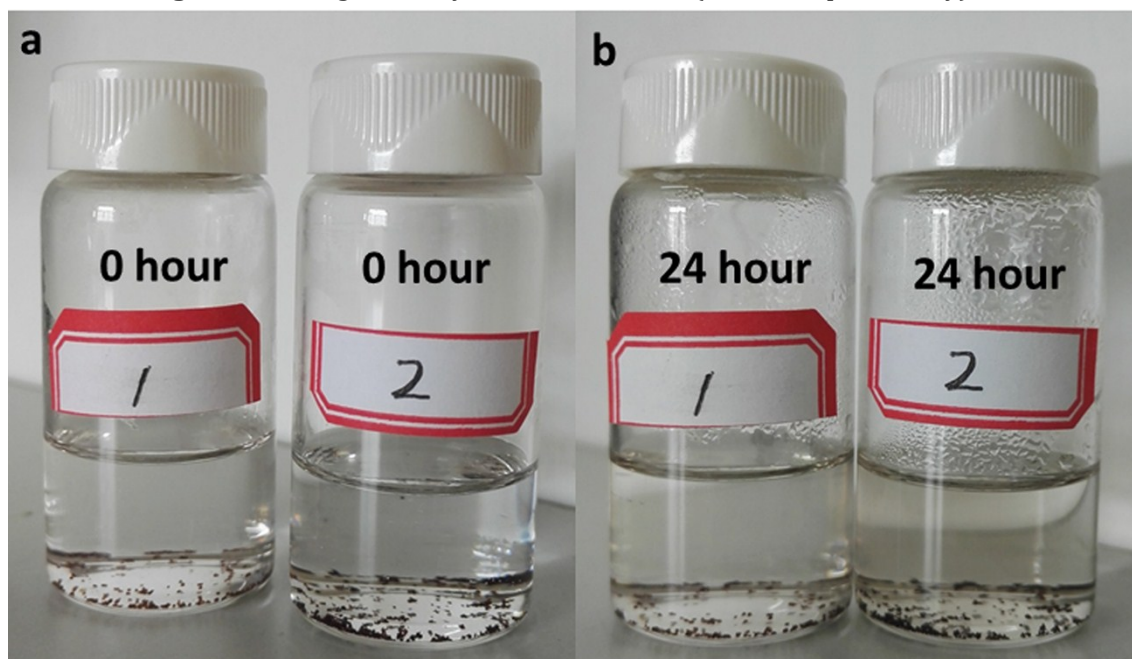

**Fig S9** 24-hours moisture absorption experiments of complexes **1** and **2**.

The crystals are placed in a bottle with water for 24 hours; the results of the crystals do not change, indicating that the crystals do not absorb moisture (Fig S9).

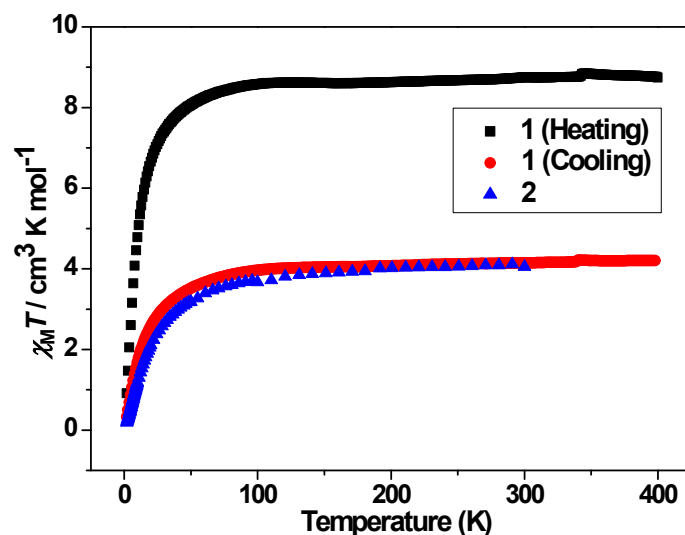

**Fig S10** Temperature dependence of magnetic susceptibilities in the form of  $\chi_M T$  vs  $T$  for **1** at 1 kOe (heating-cooling cycle from 1.8-400 K), and  $\chi_M T$  vs  $T$  for **2** (2-300K).

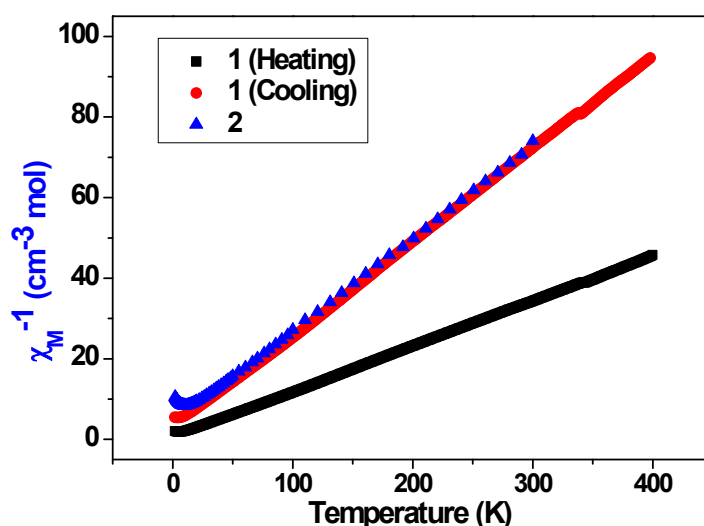

**Fig S11** Temperature dependence of magnetic susceptibilities in the form of  $\chi_M^{-1}$  vs  $T$  for **1** at 1 kOe (heating-cooling cycle from 1.8-400 K), and  $\chi_M^{-1}$  vs  $T$  for **2** (2-300K).

#### Heating-cooling cycle magnetic properties discussion

Heating-cooling cycle of magnetic susceptibilities data were recorded for polycrystalline samples of **1** at an applied magnetic field of 1000 Oe in the temperature range of 1.8-400 K. As seen in Fig. S10, The  $\chi_M T$  increases steeply from 0.95 cm<sup>3</sup> K mol<sup>-1</sup> to 8.38 cm<sup>3</sup> K mol<sup>-1</sup> from 1.8 K to 70 K and then at higher temperature increases more gradually to reach 8.75 cm<sup>3</sup> K mol<sup>-1</sup> at 400 K. When heated to 400 K, complex **1** has been transformed into complex **2**. The  $\chi_M T$  curve of **1** (cooling) is very close to the  $\chi_M T$  curve of **2**. The Curie-Weiss curve of **1** (cooling) is very close to **2**, too (Fig. S11). The result is also proved that complex **1** can be converted to compound **2** by dehydration at high temperature.
